# Supplementary material for: Effects of Post-Ruminal Urea Supplementation during the Seasonal Period on Performance and Rumen Microbiome of Rearing Grazing Nellore Cattle
Source: MDPI journal article supplement (doi:10.3390/ani12243463), 2022-12-08
Supplement: s1 [file s1]

**Table S1.** Median and IQR of ruminal archaea and bacterial abundance at genera level influenced by the soybean meal (CP) replacement by NPN in the supplement of grazing Nellore steers.

| Genera                                                                                                                                      | NNP   | IQR   | CP    | IQR   | p-value* |
|---------------------------------------------------------------------------------------------------------------------------------------------|-------|-------|-------|-------|----------|
| Bacteria;p__Bacteroidota;c__Bacteroidia;o__Bacteroidales;f__Bacteroidetes_BD2-2;g__Bacteroidetes_BD2-2                                      | 0.151 | 0.036 | 0.112 | 0.040 | 0.0027   |
| Bacteria;p__Spirochaetota;c__Spirochaetia;o__Spirochaetales;f__Spirochaetaceae;g__Sediminispirochaeta                                       | 0.017 | 0.011 | 0.028 | 0.008 | 0.00443  |
| Bacteria;p__Firmicutes;c__Clostridia;o__Lachnospirales;f__Lachnospiraceae;g__Lachnospiraceae_ND3007_group                                   | 0.554 | 0.08  | 0.472 | 0.120 | 0.00971  |
| Bacteria;p__Firmicutes;c__Negativicutes;o__Veillonellales-Selenomonadales;f__Selenomonadaceae;g__Schwartzia                                 | 0.016 | 0.007 | 0.008 | 0.012 | 0.01053  |
| Bacteria;p__Bacteroidota;c__Bacteroidia;o__Bacteroidales;f__Rikenellaceae;g__SP3-e08                                                        | 0.091 | 0.063 | 0.143 | 0.185 | 0.01508  |
| Bacteria;p__Firmicutes;c__Clostridia;o__Lachnospirales;f__Lachnospiraceae;g__[Ruminococcus]_gauvreuii_group                                 | 0.182 | 0.077 | 0.297 | 0.267 | 0.01737  |
| Bacteria;p__WPS-2;c__WPS-2;o__WPS-2;f__WPS-2;g__WPS-2                                                                                       | 0     | 0     | 0     | 0.009 | 0.02771  |
| Bacteria;p__Firmicutes;c__Clostridia;o__Lachnospirales;f__Lachnospiraceae;g__Lachnospiraceae_NK3A20_group                                   | 1.534 | 0.438 | 1.746 | 0.429 | 0.02987  |
| Bacteria;p__Bacteroidota;c__Bacteroidia;o__Bacteroidales;f__F082;g__F082                                                                    | 3.859 | 1.349 | 4.535 | 1.371 | 0.02987  |
| Bacteria;p__Firmicutes;c__Clostridia;o__Lachnospirales;f__Lachnospiraceae;g__Lachnoclostridium                                              | 0.022 | 0.018 | 0.038 | 0.023 | 0.04368  |
| Bacteria;p__Proteobacteria;c__Gammaproteobacteria;o__Aeromonadales;f__Succinivibrionaceae;g__Succinivibrionaceae_UCG-002                    | 0.028 | 0.037 | 0.02  | 0.016 | 0.04369  |
| Bacteria;p__Verrucomicrobiota;c__Lentisphaeria;o__Victivallales;f__vadinBE97;g__vadinBE97                                                   | 0.014 | 0.008 | 0.011 | 0.006 | 0.04664  |
| Bacteria;p__Proteobacteria;c__Alphaproteobacteria;o__Rhodospirillales;f__uncultured;g__uncultured                                           | 0.028 | 0.022 | 0.013 | 0.019 | 0.04678  |
| Bacteria;p__Firmicutes;c__Clostridia;o__Lachnospirales;f__Lachnospiraceae;g__Lachnospiraceae                                                | 0.208 | 0.068 | 0.142 | 0.079 | 0.04942  |
| Bacteria;p__Firmicutes;c__Clostridia;o__Lachnospirales;f__Lachnospiraceae;g__probable_genus_10                                              | 0.125 | 0.048 | 0.098 | 0.061 | 0.04942  |
| Bacteria;p__Bacteroidota;c__Bacteroidia;o__Bacteroidales;f__Prevotellaceae;g__Prevotellaceae_UCG-003                                        | 1.080 | 0.418 | 1.009 | 0.41  | 0.05571  |
| Bacteria;p__Firmicutes;c__Clostridia;o__Lachnospirales;f__Lachnospiraceae;g__[Eubacterium]_ruminantium_group                                | 0.752 | 0.228 | 0.644 | 0.236 | 0.06267  |
| Bacteria;p__Firmicutes;c__Clostridia;o__uncultured;f__uncultured;g__uncultured                                                              | 0     | 0     | 0     | 0.001 | 0.06559  |
| Bacteria;p__Actinobacteriota;c__Actinobacteria;o__Bifidobacteriales;f__Bifidobacteriaceae;g__Bifidobacterium                                | 0.012 | 0.010 | 0.055 | 0.093 | 0.06914  |
| Bacteria;p__Bacteroidota;c__Bacteroidia;o__Bacteroidales;f__PeH15;g__PeH15                                                                  | 0.037 | 0.034 | 0.032 | 0.015 | 0.07438  |
| Bacteria;p__Firmicutes;c__Clostridia;o__Lachnospirales;f__Lachnospiraceae;g__Stomatobaculum                                                 | 0.329 | 0.066 | 0.280 | 0.065 | 0.07868  |
| Bacteria;p__Firmicutes;c__Clostridia;o__Lachnospirales;f__Lachnospiraceae;g__[Eubacterium]_xylanophilum_group                               | 0.148 | 0.011 | 0.130 | 0.042 | 0.07868  |
| Bacteria;p__Firmicutes;c__Clostridia;o__Peptostreptococcales-Tissierellales;f__Anaerovoracaceae;g__Mogibacterium                            | 0.27  | 0.084 | 0.301 | 0.055 | 0.07873  |
| Archaea;p__Thermoplasmatota;c__Thermoplasmata;o__Methanomassiliicoccales;f__Methanomethylophilaceae;g__uncultured                           | 0.086 | 0.113 | 0.115 | 0.137 | 0.07873  |
| Bacteria;p__Firmicutes;c__Bacilli;o__Lactobacillales;f__Lactobacillaceae;g__Lactobacillus                                                   | 0.013 | 0.055 | 0.058 | 0.114 | 0.07873  |
| Bacteria;p__Firmicutes;c__Clostridia;o__Lachnospirales;f__Lachnospiraceae;g__Roseburia                                                      | 0     | 0.005 | 0.009 | 0.023 | 0.08052  |
| Bacteria;p__Firmicutes;c__Bacilli;__;__                                                                                                     | 0     | 0.003 | 0.003 | 0.007 | 0.08144  |
| Bacteria;p__Bacteroidota;c__Bacteroidia;o__Bacteroidales;f__Prevotellaceae;g__uncultured                                                    | 0.143 | 0.058 | 0.129 | 0.053 | 0.08793  |
| Bacteria;p__Firmicutes;c__Bacilli;o__Erysipelotrichales;f__Erysipelotrichaceae;g__Erysipelothrix                                            | 0     | 0     | 0     | 0.002 | 0.09259  |
| Bacteria;p__Firmicutes;c__Clostridia;o__Lachnospirales;f__Lachnospiraceae;g__[Eubacterium]_cellulosolvens_group                             | 0.033 | 0.023 | 0.038 | 0.028 | 0.09274  |
| Bacteria;p__Patescibacteria;c__Gracilibacteria;o__Absconditabacteriales_(SR1);f__Absconditabacteriales_(SR1);g__Absconditabacteriales_(SR1) | 0.015 | 0.017 | 0.022 | 0.034 | 0.09619  |
| Bacteria;p__Firmicutes;c__Clostridia;o__Lachnospirales;f__Lachnospiraceae;g__Blautia                                                        | 0.127 | 0.031 | 0.141 | 0.047 | 0.09798  |
| Bacteria;p__Actinobacteriota;c__Coriobacteriia;o__Coriobacteriales;f__Atopobiaceae;__                                                       | 0.054 | 0.039 | 0.085 | 0.093 | 0.09798  |
| Bacteria;p__Actinobacteriota;c__Actinobacteria;o__Bifidobacteriales;f__Bifidobacteriaceae;g__uncultured                                     | 0.054 | 0.081 | 0.086 | 0.176 | 0.09798  |

\*TP-U/TP-PRU vs NPN-U-PRU/NPN-PRU (Soybean meal replacement by NPN) using a Friedman test.

**Table S2.** Median and IQR of ruminal archaea and bacterial abundance at genera level influenced by low and high post-ruminal urea (PRU) in the supplement of grazing Nellore steers.

| Genera                                                                                                                   | NPN-P<br>RU | IQR   | NPN-U-<br>PRU | IQR   | p-value* |
|--------------------------------------------------------------------------------------------------------------------------|-------------|-------|---------------|-------|----------|
| Archaea;p__Thermoplasmatota;c__Thermoplasmata;o__Methanomassiliicoccales;f__Methanomethylophilaceae;g__uncultured        | 0.067       | 0.052 | 0.165         | 0.130 | 0.0117   |
| Bacteria;p__Firmicutes;c__Clostridia;o__Clostridia;f__Hungateiclostridiaceae;g__Saccharofermentans                       | 1.931       | 0.527 | 2.307         | 0.504 | 0.0117   |
| Bacteria;p__Bacteroidota;c__Bacteroidia;o__Bacteroidales;f__Bacteroidetes_BD2-2;g__Bacteroidetes_BD2-2                   | 0.128       | 0.036 | 0.164         | 0.027 | 0.0173   |
| Bacteria;p__Firmicutes;c__Clostridia;o__Oscillospirales;f__Oscillospiraceae;g__Papillibacter                             | 0.024       | 0.027 | 0.000         | 0.000 | 0.0277   |
| Bacteria;p__Firmicutes;c__Clostridia;o__Peptostreptococcales-Tissierellales;f__Anaerovoracaceae;g__Mogibacterium         | 0.304       | 0.040 | 0.242         | 0.054 | 0.0280   |
| Bacteria;p__Actinobacteriota;c__Coriobacteriia;o__Coriobacteriales;f__Atopobiaceae;__                                    | 0.077       | 0.041 | 0.040         | 0.028 | 0.0357   |
| Bacteria;p__Myxococcota;c__Myxococcia;o__Myxococcales;f__Myxococcaceae;__                                                | 0.000       | 0.000 | 0.003         | 0.007 | 0.0412   |
| Bacteria;p__Proteobacteria;c__Gammaproteobacteria;o__Aeromonadales;f__Succinivibrionaceae;g__Succinivibrionaceae_UCG-002 | 0.021       | 0.008 | 0.059         | 0.084 | 0.0499   |
| Bacteria;p__Firmicutes;c__Clostridia;o__Lachnospirales;f__Lachnospiraceae;g__[Eubacterium]_ruminantium_group             | 0.698       | 0.293 | 0.778         | 0.141 | 0.0499   |
| Bacteria;p__Actinobacteriota;c__Actinobacteria;o__Corynebacteriales;f__Corynebacteriaceae;g__Corynebacterium             | 0.015       | 0.011 | 0.003         | 0.012 | 0.0499   |
| Bacteria;p__Firmicutes;c__Clostridia;o__Oscillospirales;__;                                                              | 0.756       | 0.223 | 1.061         | 0.410 | 0.0499   |
| Bacteria;p__Firmicutes;c__Bacilli;o__Erysipelotrichales;f__Erysipelotrichaceae;__                                        | 0.009       | 0.010 | 0.000         | 0.001 | 0.0578   |
| Bacteria;p__Firmicutes;c__Clostridia;o__Eubacteriales;f__Eubacteriaceae;g__Eubacterium                                   | 0.000       | 0.001 | 0.007         | 0.019 | 0.0585   |
| Bacteria;p__Firmicutes;c__Clostridia;o__Peptostreptococcales-Tissierellales;__;                                          | 0.013       | 0.012 | 0.005         | 0.014 | 0.0630   |
| Bacteria;p__Firmicutes;c__Syntrophomonadia;o__Syntrophomonadales;f__Syntrophomonadaceae;g__Syntrophomonas                | 0.000       | 0.000 | 0.004         | 0.006 | 0.0656   |
| Bacteria;p__Firmicutes;c__Clostridia;o__Clostridiales;f__Clostridiaceae;g__Clostridium_sensu_stricto_1                   | 0.007       | 0.018 | 0.000         | 0.000 | 0.0679   |
| Bacteria;p__Proteobacteria;c__Gammaproteobacteria;o__Aeromonadales;f__Succinivibrionaceae;g__Ruminobacter                | 0.016       | 0.003 | 0.008         | 0.005 | 0.0684   |
| Bacteria;p__Firmicutes;c__Clostridia;o__Lachnospirales;f__Lachnospiraceae;g__[Ruminococcus]_gnavus_group                 | 0.207       | 0.192 | 0.162         | 0.080 | 0.0687   |
| Bacteria;p__Proteobacteria;c__Alphaproteobacteria;o__Rickettsiales;f__uncultured;g__uncultured                           | 0.051       | 0.028 | 0.082         | 0.059 | 0.0687   |
| Bacteria;p__Bacteroidota;c__Bacteroidia;o__Bacteroidales;f__Muribaculaceae;g__Muribaculaceae                             | 0.360       | 0.089 | 0.256         | 0.098 | 0.0687   |
| Bacteria;p__Firmicutes;c__Clostridia;o__Oscillospirales;f__Oscillospiraceae;g__uncultured                                | 0.151       | 0.029 | 0.111         | 0.016 | 0.0687   |
| Bacteria;p__Firmicutes;c__Clostridia;o__Christensenellales;f__Christensenellaceae;g__Christensenellaceae_R-7_group       | 12.031      | 4.131 | 10.795        | 3.352 | 0.0687   |
| Bacteria;p__Actinobacteriota;c__Coriobacteriia;o__Coriobacteriales;f__Atopobiaceae;g__Olsenella                          | 0.532       | 0.200 | 0.458         | 0.133 | 0.0929   |
| Bacteria;p__Spirochaetota;c__Spirochaetia;o__Spirochaetales;f__Spirochaetaceae;g__Treponema                              | 0.815       | 0.515 | 1.562         | 0.944 | 0.0929   |
| Bacteria;p__Firmicutes;c__Clostridia;o__Peptostreptococcales-Tissierellales;f__Anaerovoracaceae;g__Amnispila             | 0.136       | 0.014 | 0.122         | 0.028 | 0.0929   |
| Bacteria;p__Firmicutes;c__Clostridia;o__Clostridia;f__Hungateiclostridiaceae;__                                          | 0.053       | 0.029 | 0.029         | 0.025 | 0.0929   |

\* NPN-U-PRU vs NPN-PRU (low and high post-ruminal urea (PRU) level using a paired Wilcoxon signed rank sum test.

**Table S3.** Median and IQR of ruminal archaea and bacterial abundance at genera level influenced by conventional urea or post-ruminal urea (PRU) in the supplement of grazing Nellore steers.

| Genera                                                                                                                                    | TP-<br>PR<br>U | IQR   | TP-<br>U | IQR   | p-value<br>* |
|-------------------------------------------------------------------------------------------------------------------------------------------|----------------|-------|----------|-------|--------------|
| Bacteria;p__Firmicutes;c__Clostridia;o__Peptostreptococcales-Tissierellales;f__Anaerovoracaceae;g__[Eubacterium]_nodatum_group            | 0.170          | 0.105 | 0.307    | 0.186 | 0.0117       |
| Bacteria;p__Bacteroidota;c__Bacteroidia;o__Bacteroidales;__                                                                               | 1.160          | 0.074 | 1.382    | 0.363 | 0.0117       |
| Bacteria;p__Firmicutes;c__Clostridia;o__Lachnospirales;f__Lachnospiraceae;g__[Eubacterium]_hallii_group                                   | 0.976          | 0.113 | 1.197    | 0.154 | 0.0172       |
| Bacteria;p__Firmicutes;c__Clostridia;o__Peptostreptococcales-Tissierellales;f__Anaerovoracaceae;g__Mogibacterium                          | 0.289          | 0.059 | 0.333    | 0.046 | 0.0173       |
| Bacteria;p__Firmicutes;c__Clostridia;o__Oscillospirales;f__Oscillospiraceae;g__Oscillospira                                               | 0.015          | 0.019 | 0.064    | 0.046 | 0.0173       |
| Bacteria;p__Firmicutes;c__Bacilli;o__Erysipelotrichales;f__Erysipelotrichaceae;g__Turicibacter                                            | 0.005          | 0.109 | 0.000    | 0.001 | 0.0273       |
| Bacteria;p__Firmicutes;c__Clostridia;o__Oscillospirales;f__Oscillospiraceae;g__Intestinimonas                                             | 0.000          | 0.000 | 0.010    | 0.014 | 0.0277       |
| Bacteria;p__Desulfobacterota;c__Desulfovibrionia;o__Desulfovibrionales;f__Desulfovibrionaceae;g__Mailhella                                | 0.025          | 0.012 | 0.031    | 0.013 | 0.0298       |
| Bacteria;p__Actinobacteriota;c__Coriobacteriia;o__Coriobacteriales;f__Atopobiaceae;g__Olsenella                                           | 0.506          | 0.189 | 0.739    | 0.211 | 0.0357       |
| Bacteria;p__Firmicutes;c__Negativicutes;o__Acidaminococcales;f__Acidaminococcaceae;g__Succiniclasticum                                    | 1.303          | 0.180 | 1.690    | 0.688 | 0.0499       |
| Bacteria;p__Firmicutes;c__Clostridia;o__Peptococcales;f__Peptococcaceae;g__uncultured                                                     | 0.009          | 0.006 | 0.000    | 0.008 | 0.0630       |
| Bacteria;p__Firmicutes;c__Bacilli;o__Erysipelotrichales;f__Erysipelatoclostridiaceae;g__Erysipelotrichaceae_UCG-002                       | 0.002          | 0.023 | 0.000    | 0.000 | 0.0679       |
| Bacteria;p__Actinobacteriota;c__Actinobacteria;o__Corynebacteriales;f__Corynebacteriaceae;g__Corynebacterium                              | 0.014          | 0.016 | 0.023    | 0.013 | 0.0684       |
| Bacteria;p__Firmicutes;c__Clostridia;o__Lachnospirales;f__Lachnospiraceae;g__[Ruminococcus]_gauvreauii_group                              | 0.227          | 0.196 | 0.403    | 0.308 | 0.0687       |
| Bacteria;p__Bacteroidota;c__Bacteroidia;o__Bacteroidales;f__uncultured;g__uncultured                                                      | 0.183          | 0.063 | 0.265    | 0.080 | 0.0687       |
| Bacteria;p__Verrucomicrobiota;c__Lentisphaeria;o__Victivallales;f__vadinBE97;g__vadinBE97                                                 | 0.009          | 0.004 | 0.013    | 0.003 | 0.0687       |
| Bacteria;p__Bacteroidota;c__Bacteroidia;o__Bacteroidales;f__Bacteroidales_BS11_gut_group;g__Bacteroidales_BS11_gut_group                  | 0.362          | 0.211 | 0.584    | 0.185 | 0.0687       |
| Bacteria;p__Firmicutes;c__Clostridia;o__Lachnospirales;f__Lachnospiraceae;g__Stomatobaculum                                               | 0.271          | 0.030 | 0.305    | 0.110 | 0.0687       |
| Bacteria;p__Verrucomicrobiota;c__Kiritimatiellae;o__WCHB1-41;f__WCHB1-41;g__WCHB1-41                                                      | 0.016          | 0.021 | 0.026    | 0.013 | 0.0754       |
| Bacteria;p__Firmicutes;c__Bacilli;o__Erysipelotrichales;f__Erysipelotrichaceae;g__Erysipelothrix                                          | 0.000          | 0.000 | 0.002    | 0.006 | 0.0782       |
| Bacteria;p__Firmicutes;c__Clostridia;o__Oscillospirales;f__Ruminococcaceae;g__CAG-352                                                     | 0.000          | 0.002 | 0.006    | 0.014 | 0.0796       |
| Bacteria;p__Elusimicrobiota;c__Endomicrobia;o__Endomicrobiales;f__Endomicrobiaceae;g__Endomicrobium                                       | 0.010          | 0.015 | 0.020    | 0.013 | 0.0910       |
| Bacteria;p__Firmicutes;c__Clostridia;o__Peptostreptococcales-Tissierellales;f__Anaerovoracaceae;g__Amnipila                               | 0.104          | 0.026 | 0.141    | 0.055 | 0.0929       |
| Bacteria;p__Firmicutes;c__Clostridia;o__Peptostreptococcales-Tissierellales;f__Anaerovoracaceae;g__Anaerovorax                            | 0.363          | 0.045 | 0.381    | 0.088 | 0.0929       |
| Bacteria;p__Firmicutes;c__Clostridia;o__Oscillospirales;f__[Eubacterium]_coprostanoligenes_group;g__[Eubacterium]_coprostanoligenes_group | 1.180          | 0.404 | 1.344    | 0.292 | 0.0929       |
| Bacteria;p__Bacteroidota;c__Bacteroidia;o__Bacteroidales;f__Bacteroidales_RF16_group;g__Bacteroidales_RF16_group                          | 0.450          | 0.105 | 0.482    | 0.046 | 0.0929       |

\*TP-U vs TP-PRU (conventional urea vs PRU) using a paired Wilcoxon signed rank sum test
